# Supplementary material
Source: MDPI journal article supplement (https://www.mdpi.com/2077-0472/13/3/736)
Supplement: s1 [file s1 › agriculture-2257198-supplementary.pdf]

# Representative Elementary Volume as a Function of Land Uses and Soil Processes Based on 3D Pore System Analysis

## Supplementary Material

Figure S1 below shows a schematic of the procedures performed in the image processing. After tomographic scanning and image reconstruction, the images were cropped using the ImageJ cropping tool. Then the raw images were filtered (Median 3D filter) to remove artifacts and subjected to procedures for better definition between the pores and the particles (Unsharp masking). Finally, the images were subjected to the segmentation process using the Otsu method in ImageJ.

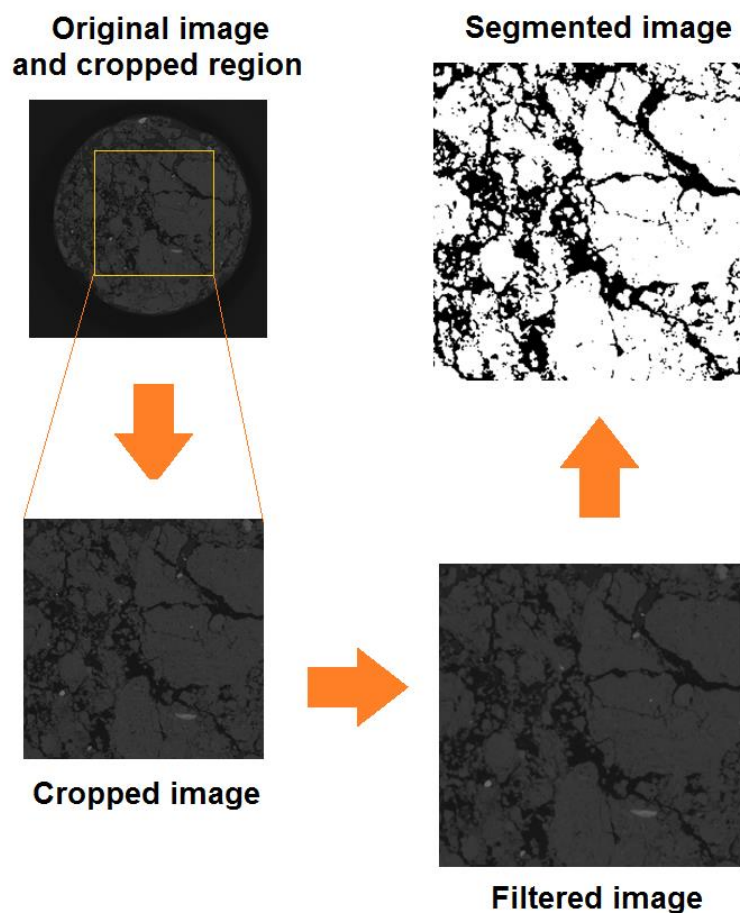

Figure S1. Schematic drawing showing the basic procedures performed in the segmentation of tomography images. This image is a 2D section of soil under conventional tillage.
